# Supplementary material for: Electroacupuncture Alleviates Diabetic Peripheral Neuropathy by Regulating Glycolipid-Related GLO/AGEs/RAGE Axis
Source: Front Endocrinol (Lausanne). 2021 Jul 6;12:655591. doi: 10.3389/fendo.2021.655591 (PMC8290521; doi:10.3389/fendo.2021.655591)
Supplement: Supplementary file 1 [file Table_1.xlsx]

## Sheet: Sheet1
Microcirculatory Blood Perfusion(PU)
Control	Model	EA
175.49	81.65	107.91
151.52	84.01	154.49
137.57	72.16	144.51
194.45	68.84	105.72
140.82	90.7	128
139.97	90.62	99.93
